# Supplementary material for: Boosting the electrochemical properties of CoCo2O4 porous nanowire arrays by microwave-assisted synthesis for battery–supercapacitor hybrid devices
Source: Royal Society of Chemistry journal article supplement (doi:10.1039/d1se00636c), 2021-01-01
Supplement: d1se00636c1.pdf [file d1se00636c1.pdf]

## Boosting electrochemical properties of $\text{CoCo}_2\text{O}_4$ porous nanowire arrays by microwave-assisted synthesis for battery-supercapacitor hybrid devices

Yin Sun<sup>1</sup>, Xiannian Sun<sup>1\*</sup>, Junjie Zhang<sup>1</sup>, Sen Liu<sup>1</sup>, Likui Guo<sup>1</sup>, Jiapeng Bi<sup>2</sup>, Naibao Huang<sup>1\*</sup>

<sup>1</sup> College of Transportation Engineering, Dalian Maritime University, Dalian 116026, China

<sup>2</sup> School of Materials Science and Engineering, Zhejiang University, Hangzhou 310027, China

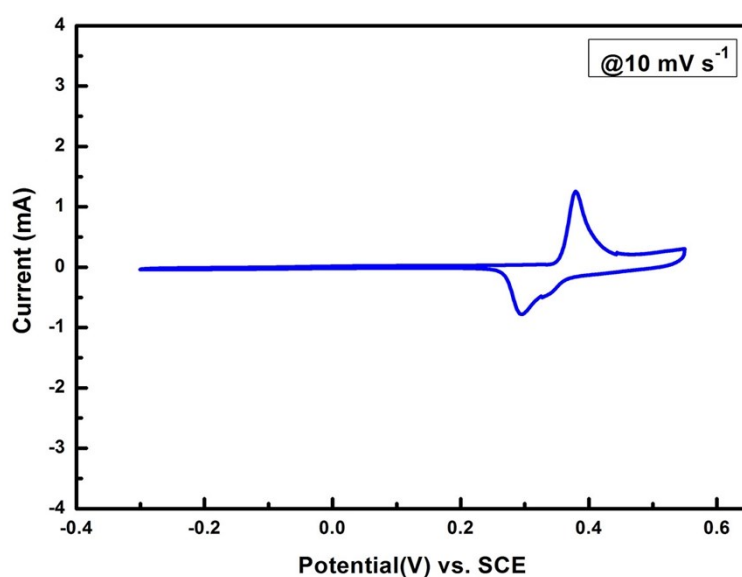

Fig. S1 CV curve at  $10 \text{ mV s}^{-1}$  of the bare Ni foam.

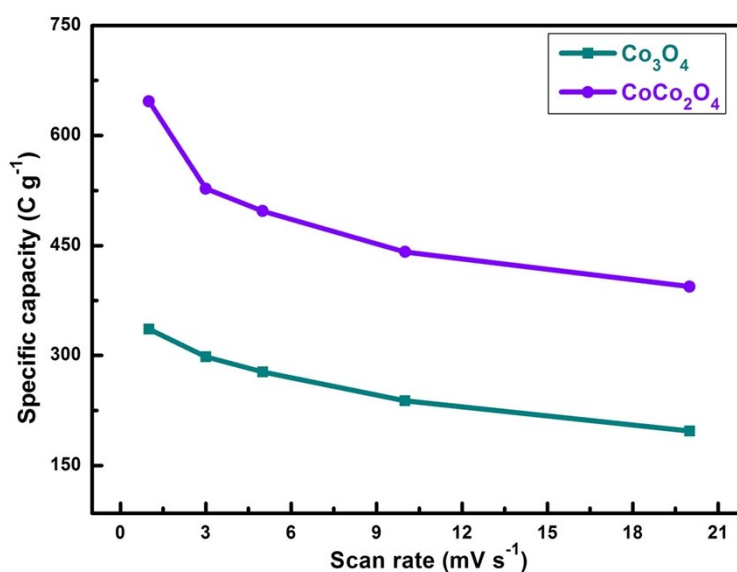

Fig.S2 Specific capacity measured of  $\text{CoCo}_2\text{O}_4$  and  $\text{Co}_3\text{O}_4$  electrodes at different scan rates.

The specific capacity ( $\text{C g}^{-1}$ ) of the prepared cobalt oxide ( $\text{Co}_3\text{O}_4$  and  $\text{CoCo}_2\text{O}_4$ ) in

three-electrode system were measured by cyclic voltammetry (CV) using the following equation (S1).

$$Cs (C g^{-1}) = \frac{\int_{V_1}^{V_2} I(V) dV}{2mv} \quad (S1)$$

where  $I$  is the current;  $m$  is the mass;  $v$  is the potential scan rate and  $\Delta V (V_2-V_1)$  is the potential window.

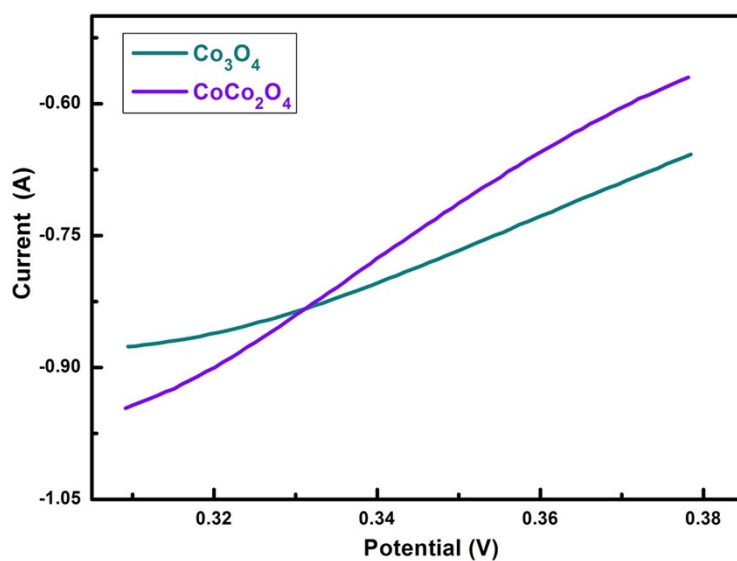

Fig.S3  $I$ - $V$  test curves of  $Co_3O_4$  and  $CoCo_2O_4$  electrode.

Tab.S1 Battery-supercapacitor hybrid device performances of Co<sub>3</sub>O<sub>4</sub>-based electrode materials prepared by different methods reported in the literature.

| Single Electrode                                                 |                                |                                                                                   |                                                | Battery-supercapacitor hybrid device                  |                                                  |                        |                      |                                                |           |
|------------------------------------------------------------------|--------------------------------|-----------------------------------------------------------------------------------|------------------------------------------------|-------------------------------------------------------|--------------------------------------------------|------------------------|----------------------|------------------------------------------------|-----------|
| Structure of Co <sub>3</sub> O <sub>4</sub> based material       | Method of synthesis            | Specific capacitance                                                              | Retention                                      | Assembly                                              | Specific capacitance                             | Energy density (Wh/kg) | Power density (W/kg) | Retention                                      | Reference |
| Co <sub>3</sub> O <sub>4</sub>                                   | Soak-adsorption                | 314 C g <sup>-1</sup> /785 F g <sup>-1</sup><br>(0.5A g <sup>-1</sup> )           | 93%<br>(5000 cycles @ 5A g <sup>-1</sup> )     | Co <sub>3</sub> O <sub>4</sub> //AC                   | /                                                | 13                     | 257                  | 85.9%<br>(10000 cycles @ 5A g <sup>-1</sup> )  | 1         |
| Co <sub>3</sub> O <sub>4</sub> /rGO-C                            | Template nanocasting technique | 354.6 C g <sup>-1</sup> /<br>1/709.1 F g <sup>-1</sup><br>(1A g <sup>-1</sup> )   | 91.2%<br>(6000 cycles @ 50mV s <sup>-1</sup> ) | Co <sub>3</sub> O <sub>4</sub> /rGO-C//rGO            | 154.2 F g <sup>-1</sup><br>(1A g <sup>-1</sup> ) | 48.2                   | 750.5                | 88.7%<br>(5000 cycles @ 50mV s <sup>-1</sup> ) | 2         |
| C/ Co <sub>3</sub> O <sub>4</sub>                                | Calcination                    | 169.2 C g <sup>-1</sup> /<br>1/423 F g <sup>-1</sup><br>(1A g <sup>-1</sup> )     | 83%<br>(2000 cycles @ 3A g <sup>-1</sup> )     | C/Co <sub>3</sub> O <sub>4</sub> //AC                 | 60.76 F g <sup>-1</sup><br>(1A g <sup>-1</sup> ) | 21.1                   | 790                  | /                                              | 3         |
| Co <sub>3</sub> O <sub>4</sub> /NiCo <sub>2</sub> O <sub>4</sub> | Hydrothermal                   | 134.2 C g <sup>-1</sup> /<br>1/335.5 F g <sup>-1</sup><br>(0.5A g <sup>-1</sup> ) | 73.6%<br>(5000 cycles @ 10A g <sup>-1</sup> )  | Co <sub>3</sub> O <sub>4</sub> //AC                   | 15 F g <sup>-1</sup><br>(0.5A g <sup>-1</sup> )  | 5.2                    | 26.5 W/kg            | 87.6%<br>(3000 cycles @ 1A g <sup>-1</sup> )   | 4         |
| Co <sub>3</sub> O <sub>4</sub> /MnO <sub>2</sub>                 | Annealing                      | 292 F g <sup>-1</sup><br>(4A g <sup>-1</sup> )                                    | 87.4%<br>(5000 cycles @ 10A g <sup>-1</sup> )  | Co <sub>3</sub> O <sub>4</sub> /MnO <sub>2</sub> //AC | 57.7 F g <sup>-1</sup><br>(2A g <sup>-1</sup> )  | 46.2                   | /                    | 84.5%<br>(5000 cycles @ 10 A g <sup>-1</sup> ) | 5         |

|                                                  |                                                |                                                                                 |                                                         |                                                                        |                                                                                   |             |              |                                                        |                  |
|--------------------------------------------------|------------------------------------------------|---------------------------------------------------------------------------------|---------------------------------------------------------|------------------------------------------------------------------------|-----------------------------------------------------------------------------------|-------------|--------------|--------------------------------------------------------|------------------|
| Co <sub>3</sub> O <sub>4</sub>                   | Hydrothermal                                   | 598.5 C g <sup>-1</sup><br>(1A g <sup>-1</sup> )                                | 93.7%<br>(8000 cycles<br>@ 10A g <sup>-1</sup> )        | Co <sub>3</sub> O <sub>4</sub> //AC                                    | 99.0 F g <sup>-1</sup><br>(1A g <sup>-1</sup> )                                   | 22.5        | 800          | 91.8%<br>(10000 cycles @<br>10 A g <sup>-1</sup> )     | 6                |
| NiMn LDH@Co <sub>3</sub> O <sub>4</sub>          | Hydrothermal                                   | 243.2 C g <sup>-1</sup><br>1/607.9 F g <sup>-1</sup><br>(0.5A g <sup>-1</sup> ) | 97%<br>(1000 cycles<br>@ 5A g <sup>-1</sup> )           | NiMn<br>LDH@Co <sub>3</sub> O <sub>4</sub><br>// activated<br>graphene | 97.3 F g <sup>-1</sup><br>(0.5 A g <sup>-1</sup> )                                | 26.49       | 350          | 73 %<br>(5000 cycles @3 A<br>g <sup>-1</sup> )         | 7                |
| NiCo <sub>2</sub> O <sub>4</sub> /<br>MWCNT/RGO  | Hydrothermal                                   | 400.5 C g <sup>-1</sup><br>1//890 F g <sup>-1</sup><br>(1A g <sup>-1</sup> )    | 91%<br>(4000 cycles<br>@ 5A g <sup>-1</sup> )           | NiCo <sub>2</sub> O <sub>4</sub> /<br>MWCNT/RG<br>O//AC                | 94.2 F g <sup>-1</sup><br>(1A g <sup>-1</sup> )                                   | 34.5        | 750          | 90.2%<br>(5000 cycles @<br>10A g <sup>-1</sup> )       | 8                |
| Co <sub>3</sub> O <sub>4</sub>                   | Electrochemical<br>deposition                  | 403 C g <sup>-1</sup> /806<br>F g <sup>-1</sup>                                 | 90.8%<br>(5000 cycles<br>@ 15A g <sup>-1</sup> )        | Co <sub>3</sub> O <sub>4</sub> //AC                                    | 81 F g <sup>-1</sup><br>(1A g <sup>-1</sup> )                                     | 25.3        | 752          | 86.5%<br>(4000 cycles @ 5A<br>g <sup>-1</sup> )        | 9                |
| Co <sub>3</sub> O <sub>4</sub> @MnO <sub>2</sub> | Hydrothermal                                   | 336 C g <sup>-1</sup> /560<br>F g <sup>-1</sup><br>(0.2A g <sup>-1</sup> )      | 95%<br>(5000 cycles<br>@ 5A g <sup>-1</sup> )           | Co <sub>3</sub> O <sub>4</sub> @MnO<br><sub>2</sub> //activated<br>GO  | 49.8 F g <sup>-1</sup><br>(1A g <sup>-1</sup> )                                   | 17.7        | 158          | 81.1%<br>(10000 cycles @<br>3A g <sup>-1</sup> )       | 10               |
| CoCo <sub>2</sub> O <sub>4</sub>                 | <b>Microwave<br/>assisted<br/>hydrothermal</b> | <b>743.8 C g<sup>-1</sup><br/>(1A g<sup>-1</sup>)</b>                           | <b>89.7%<br/>(5000 cycles<br/>@ 15A g<sup>-1</sup>)</b> | <b>CoCo<sub>2</sub>O<sub>4</sub>//m-<br/>CNT</b>                       | <b>80.2 F g<sup>-1</sup><br/>(124.3 C g<sup>-1</sup>)<br/>(1A g<sup>-1</sup>)</b> | <b>26.8</b> | <b>775.4</b> | <b>82.3%<br/>(5000 cycles @ 3A<br/>g<sup>-1</sup>)</b> | <b>This work</b> |

Tab.S2 Summary the values of different components in the fitting of EIS data.

| Parameter                             | Value                          |                                  |
|---------------------------------------|--------------------------------|----------------------------------|
|                                       | Hydrothermal synthesis         | Microwave synthesis              |
|                                       | Co <sub>3</sub> O <sub>4</sub> | CoCo <sub>2</sub> O <sub>4</sub> |
| R <sub>s</sub> (Ω)                    | 0.257                          | 0.362                            |
| C <sub>d</sub> (F)                    | 1.137                          | 1.085                            |
| R <sub>ct</sub> (Ω)                   | 1.119                          | 0.712                            |
| W <sub>2</sub> (Ω.s <sup>-0.5</sup> ) | 1.710                          | 0.979                            |

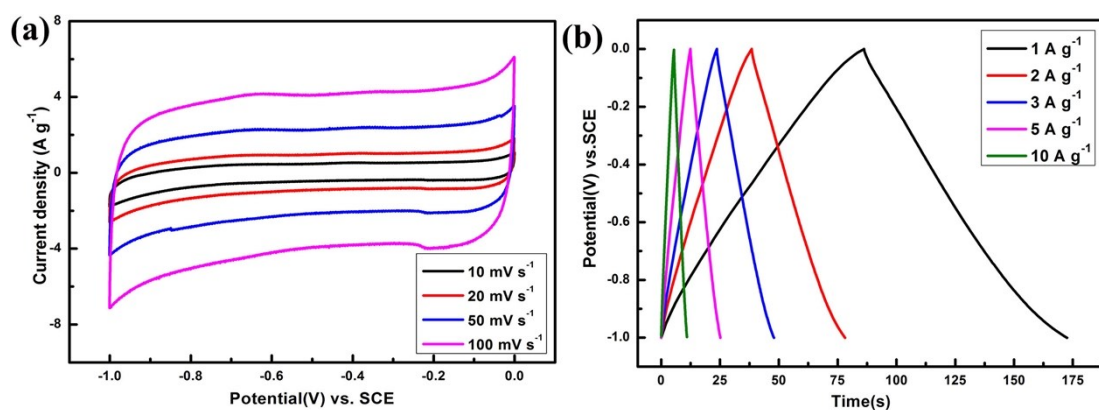

Fig.S4 CV curves at different scan rates (a), and GCD curves at different current densities (b) of the m-CNT electrode.

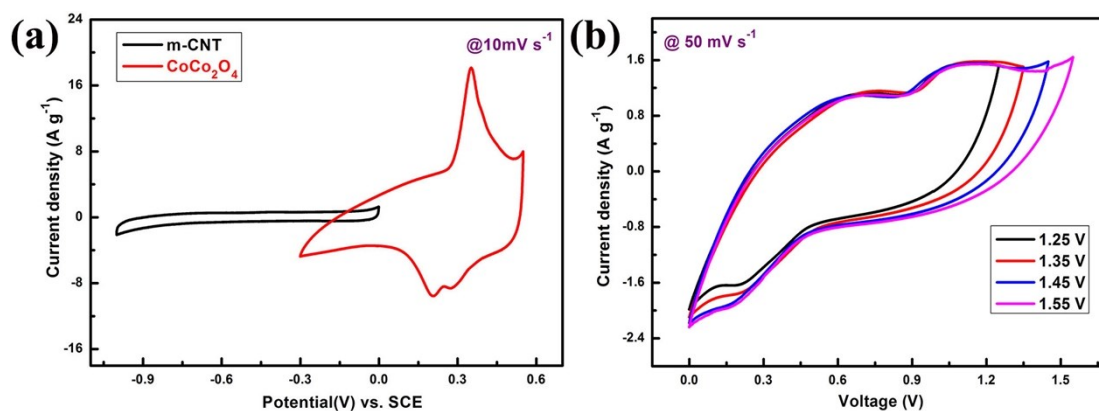

Fig.S5 (a) Comparative CV curves of m-CNT and CoCo<sub>2</sub>O<sub>4</sub> electrodes in a three-electrode system at 10 mV s<sup>-1</sup>. (b) CV curves of the BSH device measured at different potential windows at 50 mV s<sup>-1</sup>.

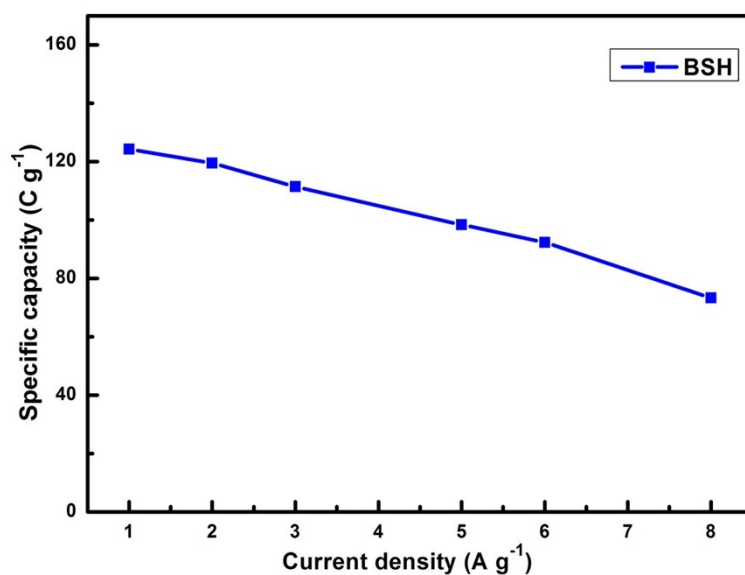

Fig.S6 Specific capacitance measured of CoCo<sub>2</sub>O<sub>4</sub>//m-CNT BSH at different current densities.

Tab.S3 Summary the values of different components in the fitting of EIS data.

| Parameter                             | Value | Deviation |
|---------------------------------------|-------|-----------|
| R <sub>1</sub> (Ω)                    | 0.591 | 0.126     |
| C <sub>1</sub> (F)                    | 0.456 | 0.403     |
| C <sub>2</sub> (F)                    | 0.041 | 0.097     |
| R <sub>2</sub> (Ω)                    | 1.764 | 0.355     |
| W <sub>2</sub> (Ω.s <sup>-0.5</sup> ) | 1.518 | 0.862     |

## References

1. Y. Zhao, Y. Liu, J. Du, X. Zhang, J. Zhou, X. Li, C. Wu, Z. Zhu, E. Xie and X. Pan, *Applied Surface Science*, 2019, **487**, 442-451.
2. C. Liu, A. Gao, F. Yi, D. Shu, H. Yi, X. Zhou, J. Hao, C. He and Z. Zhu, *Electrochimica Acta*, 2019, **326**, 134965.
3. S. Li, K. Yang, P. Ye, K. Ma, Z. Zhang and Q. Huang, *Applied Surface Science*, 2020, **503**, 144090.
4. Y. Liu, H. Zhang, Y. Yu, C. Zhu and X. Ma, *Journal of Alloys and Compounds*, 2020, **818**, 153357.
5. G. Liu, C. Kang, J. Fang, L. Fu, H. Zhou and Q. Liu, *Journal of Power Sources*, 2019, **431**, 48-54.
6. J. Zhu, B. Huang, C. Zhao, H. Xu, S. Wang, Y. Chen, L. Xie and L. Chen, *Electrochimica Acta*, 2019, **313**, 194-204.
7. H. Peng, C. Jing, J. Chen, D. Jiang, X. Liu, B. Dong, F. Dong, S. Li and Y. Zhang, *Crystengcomm*, 2019, **21**, 470-477.
8. T. Kavinkumar, K. Vinodgopal and B. Neppolian, *Applied Surface Science*, 2020, **513**, 145781.
9. X. Luo, M. Zhong, P. He, J. Shao, Q. Wang, K. Li and W. Zhao, *Journal of Alloys and Compounds*, 2020, **826**, 154241.
10. M. Huang, Y. Zhang, F. Li, L. Zhang, Z. Wen and Q. Liu, *Journal of Power Sources*, 2014, **252**, 98-106.
